# Supplementary material for: Targeted dianthin is a powerful toxin to treat pancreatic carcinoma when applied in combination with the glycosylated triterpene SO1861
Source: PubMed Central journal article supplement (PMC5664001; doi:10.1002/1878-0261.12115), 2017-09-15
Supplement: MOL2-11-1527-s007.pdf [file MOL2-11-1527-s007.pdf]

## Supplementary Table

Symptoms for toxicity are specified according to the following table that was approved by the authorities. Category A: negligible effects; category B: weak effects; category T: toxic (adverse) effects. Body condition scores (BCS): Body condition (BC) 1: Mouse is emaciated (skeletal structure extremely prominent); BC 2: Mouse is under-conditioned (segmentation of vertebral column evident).

| <b>Treatment specific symptoms</b>                                    | <b>Category</b> |
|-----------------------------------------------------------------------|-----------------|
| Skin irritation or small areas of hair loss ( $\leq 1 \text{ cm}^2$ ) | A               |
| Large areas of hair loss ( $> 1 \text{ cm}^2$ )                       | T               |
| Local inflammation at the injection site                              | B               |
| Slightly shallow breathing                                            | B               |
| Tingling or apathy or markedly shallow breathing                      | T               |
| <b>Weight and body condition scoring (BCS)</b>                        |                 |
| Body weight loss $< 15\%$ but tendency of the past 24 h increasing    | A               |
| Body weight loss $< 15\%$ and tendency of the past 24 h decreasing    | B               |
| Body weight loss $\geq 15\%$ or BC 1 or BC 2                          | T               |
| <b>Other symptoms</b>                                                 |                 |
| Shaggy fur or scratches                                               | A               |
| Retarded motion                                                       | A               |
| Decreased food intake                                                 | A               |
| Separation of the animal                                              | A               |
| Dehydration                                                           | B               |
| Temporary squatting or trembling                                      | B               |
| Sunken or dull eyes, or lividness at eyes, ears or skin               | T               |
| Motor abnormalities such as paralysis                                 | T               |
| Superficial injuries (e.g. bite wounds)                               | T               |
| Automutilation of limbs                                               | T               |
| Blood on body openings or bloody feces                                | T               |
| Systemic infections                                                   | T               |
| Constant squatting or trembling, or abnormal posture                  | T               |
| Paralysis                                                             | T               |
| Rectal prolapse                                                       | T               |
| Dark discoloration of the abdomen                                     | T               |
| Moribund                                                              | T               |
